# Supplementary material for: Fisetin alleviates unilateral ureteral obstruction-induced renal interstitial fibrosis by inhibiting Src activation to block macrophage-myofibroblast transition
Source: Research Square preprint supplement (doi:10.21203/rs.3.rs-7548347/v1), 2025-10-15

**Fig.1D（collagen-1）**


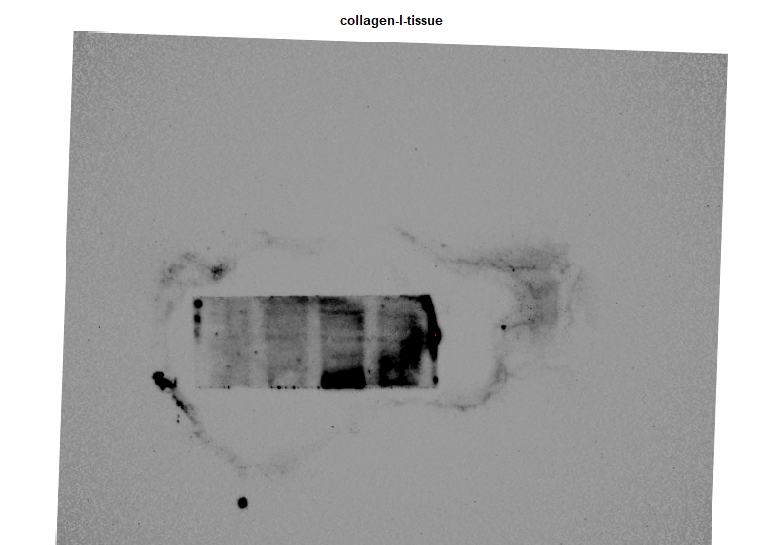


Fig.1D(GAPDH)


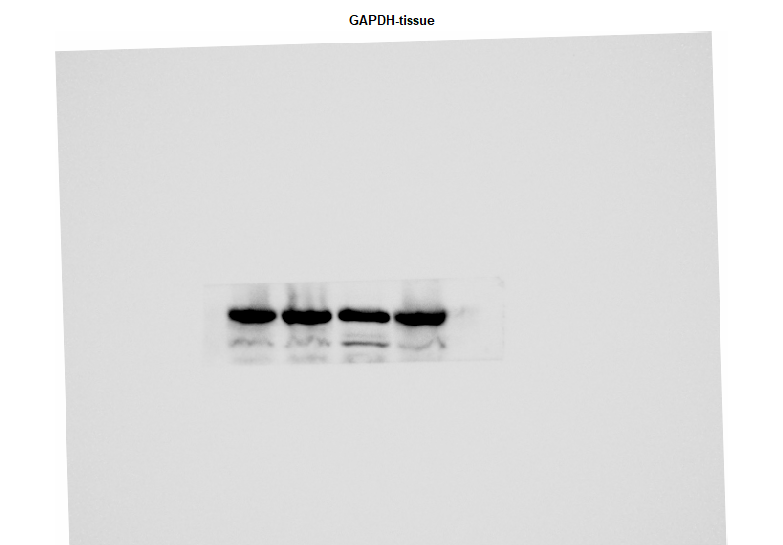


Fig.1D(α-SMA)


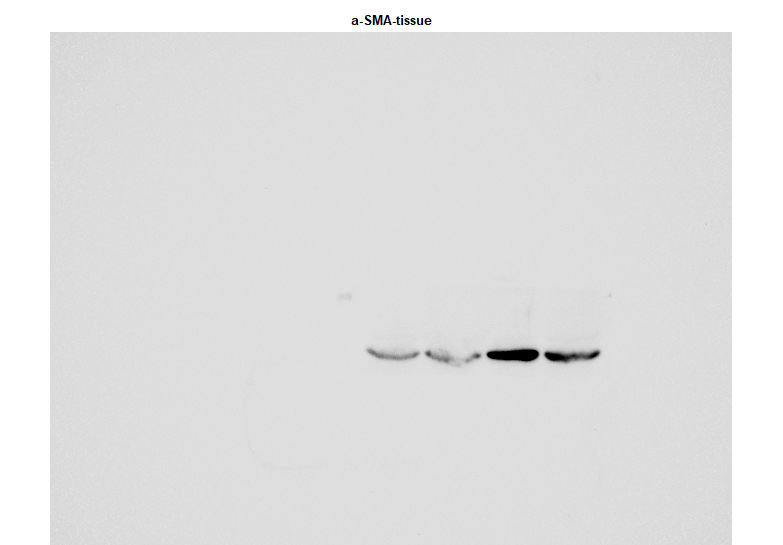


Fig.3D（collagen-1）


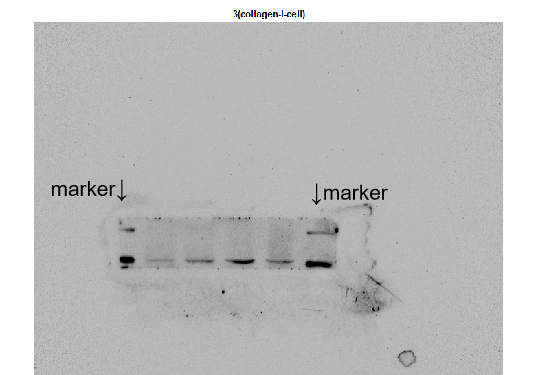


Fig.3D(GAPDH)


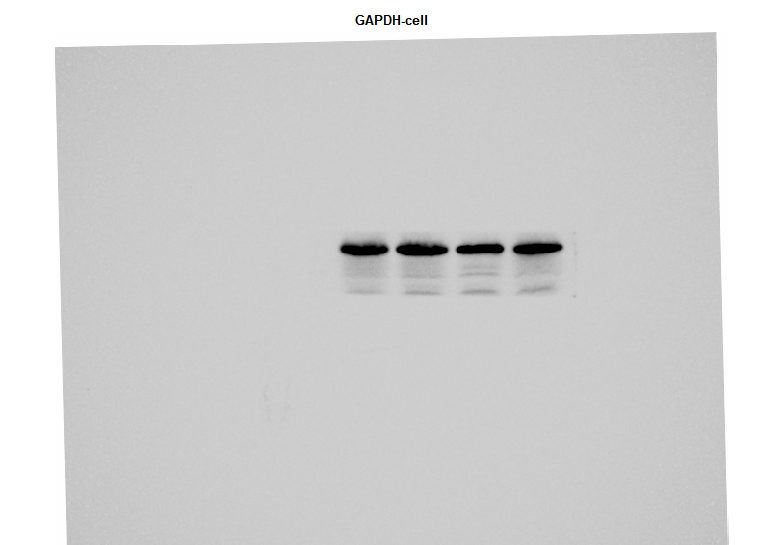


Fig.3D(α-SMA)


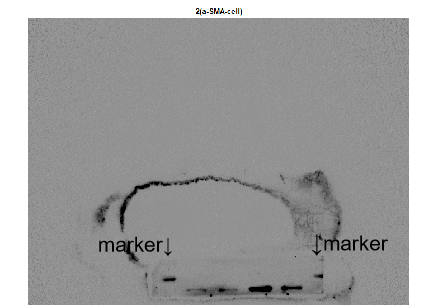


Fig.5A(GAPDH)


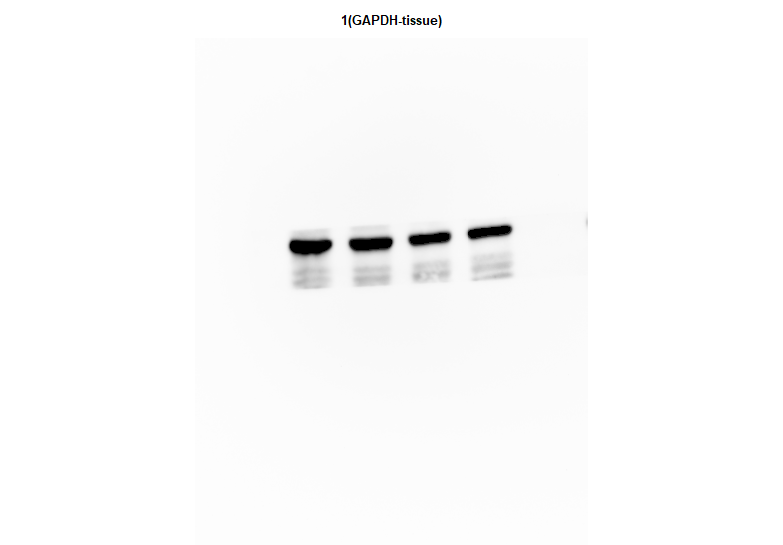


Fig.5A(pSrc)


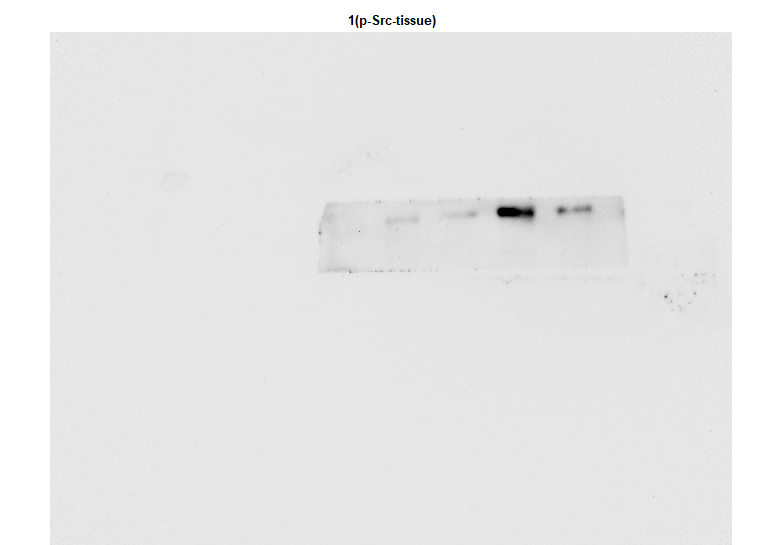


Fig.5A(Src)


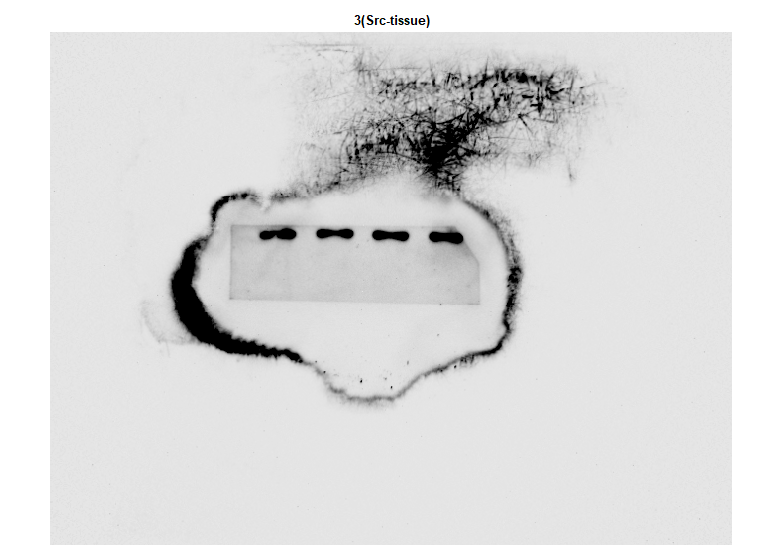


Fig.5B(EGFR)


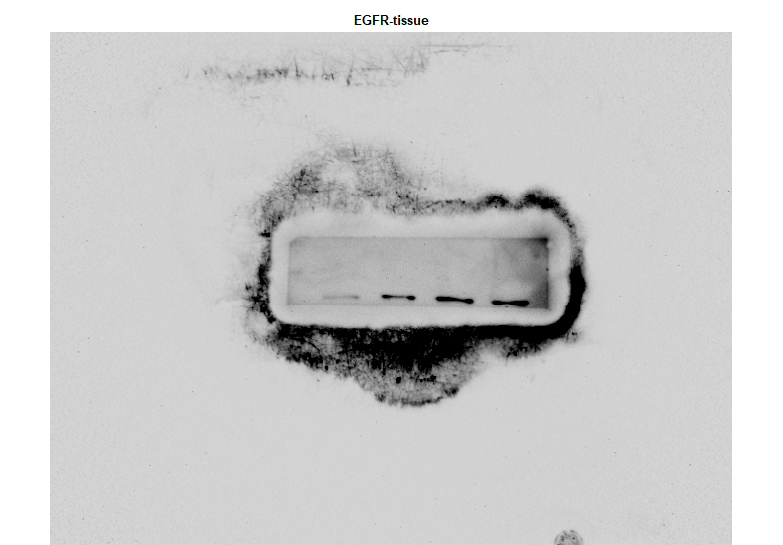


Fig.5B(GAPDH)


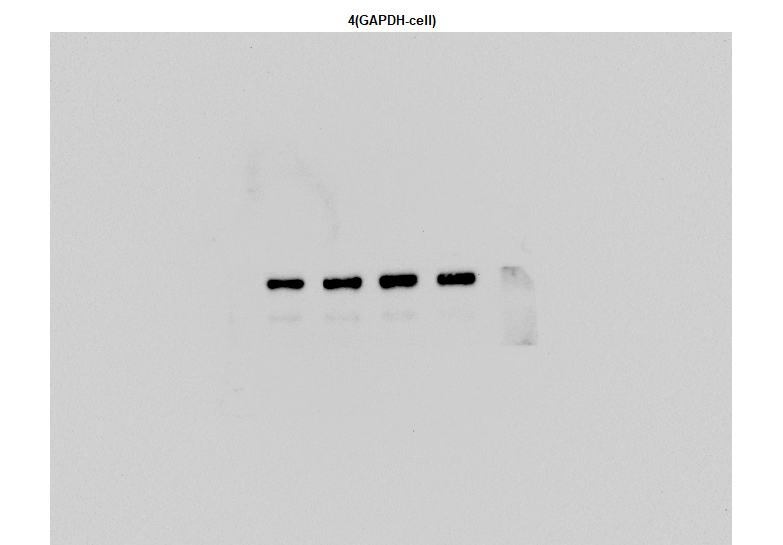


Fig.5B(pEGFR)
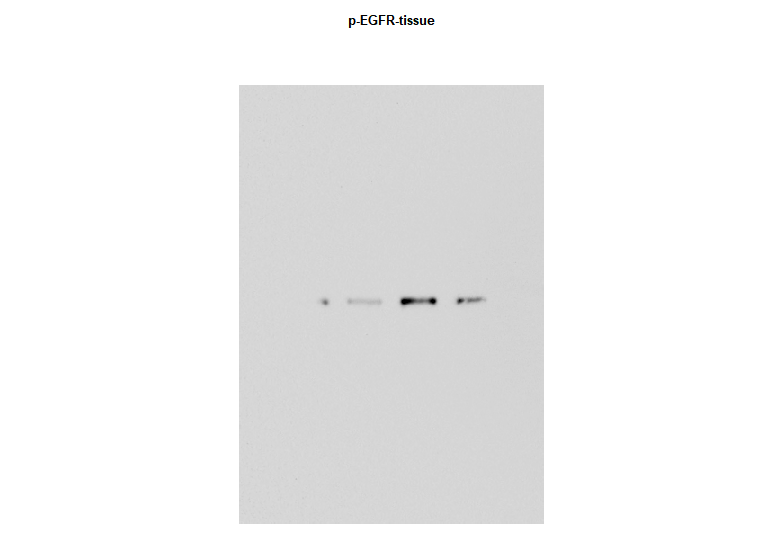


Fig.5C(ERK)
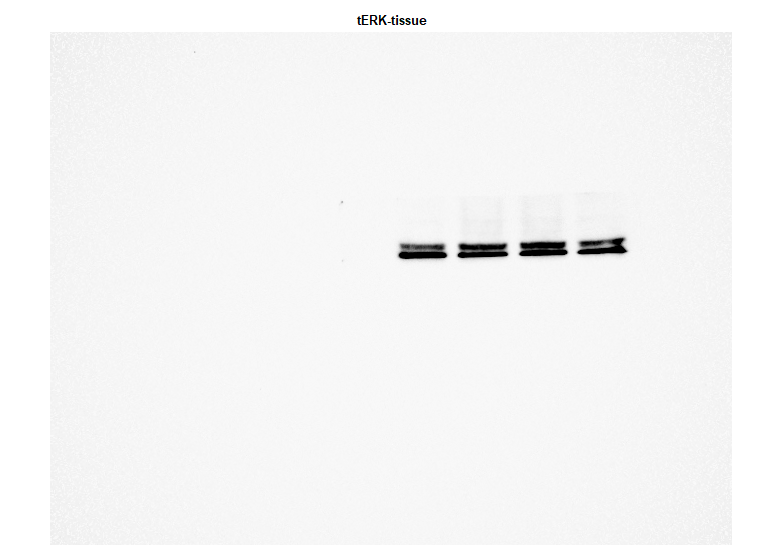


Fig.5C(GAPDH)
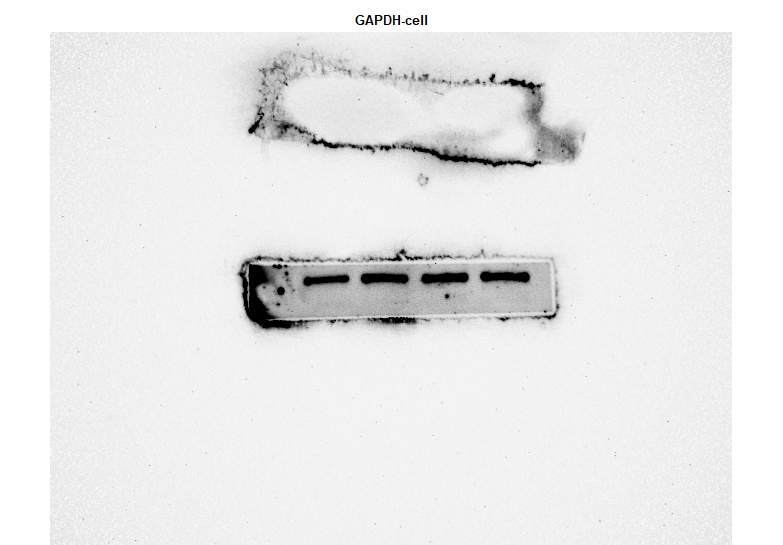


Fig.5C（GAPDH）


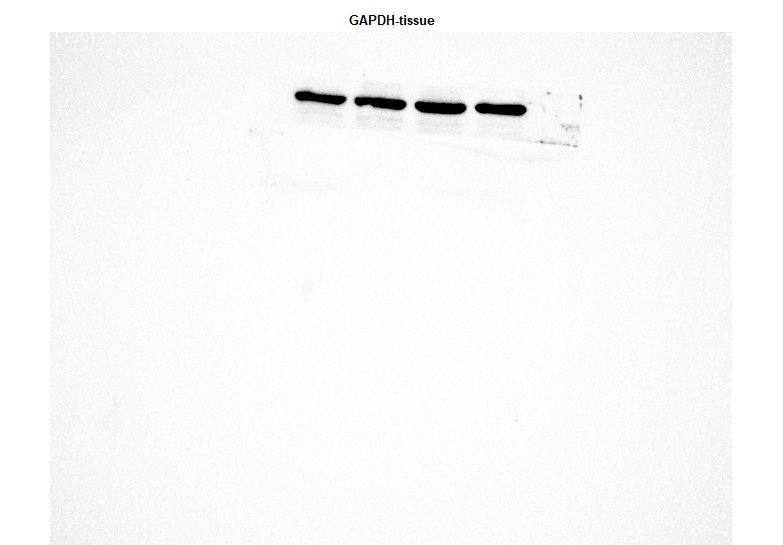


Fig.5C(pERK)
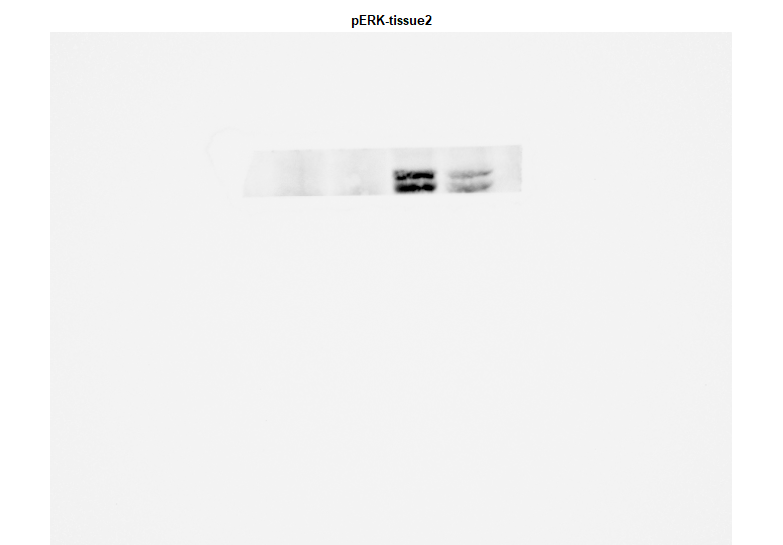


Fig.5D(GAPDH)
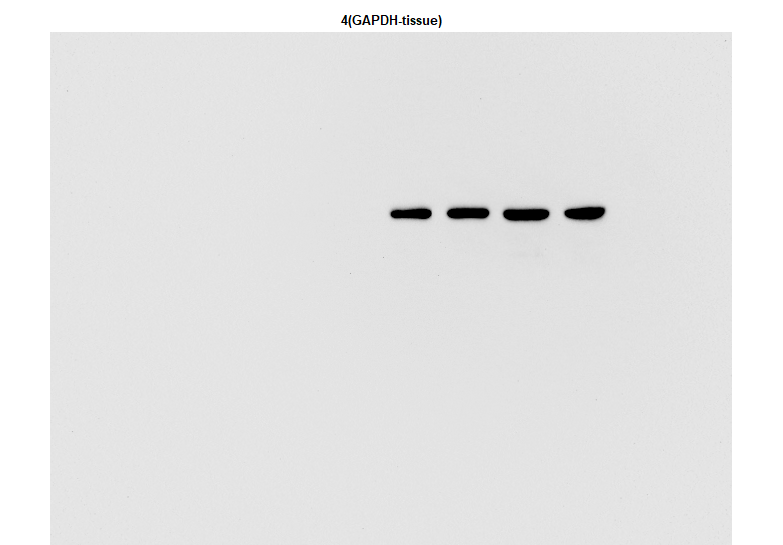


Fig.5D(Smad3) (2)
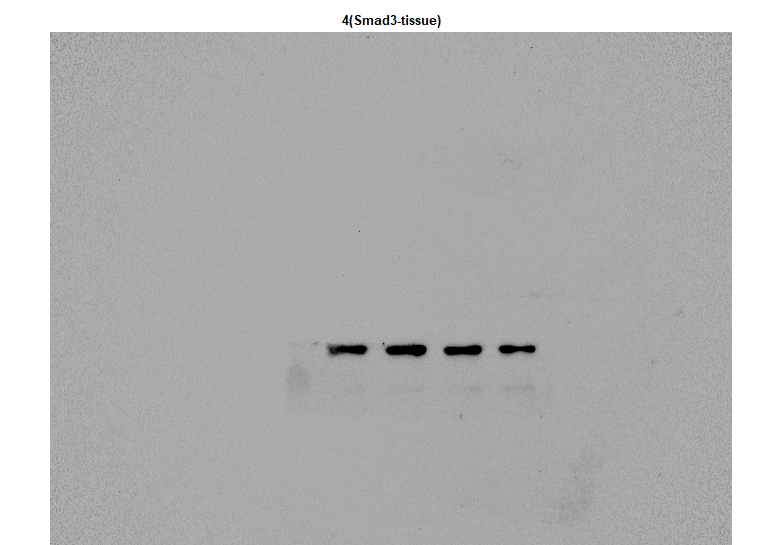


Fig.5D(Smad3)
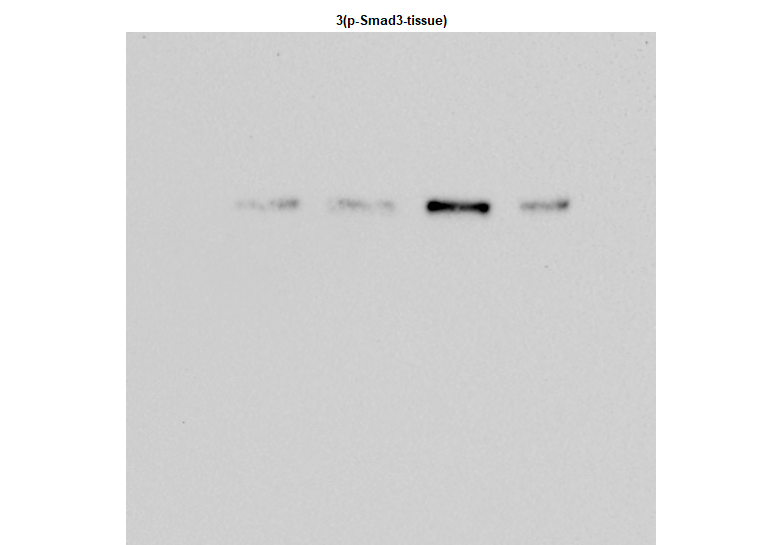


Fig.6A(GAPDH)
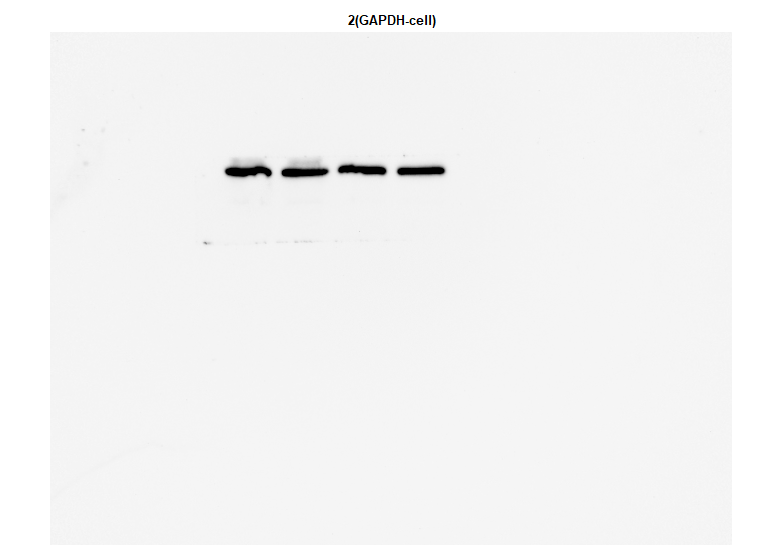


Fig.6A(pSrc)
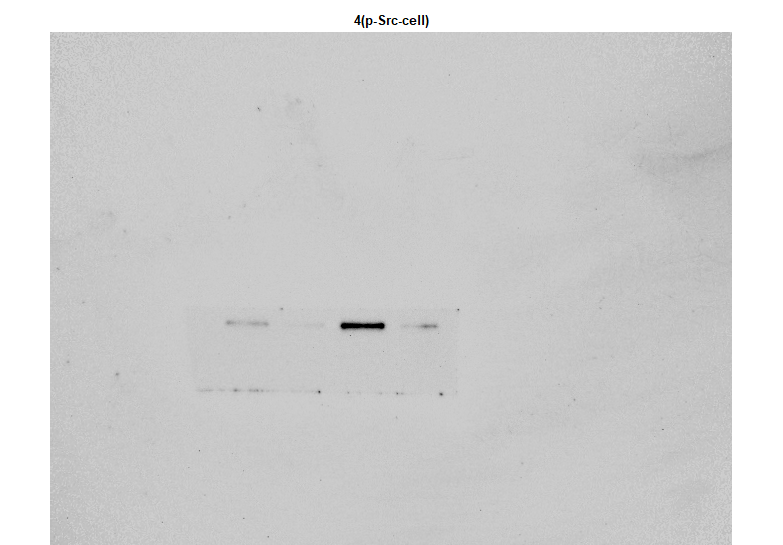


Fig.6A(Src)
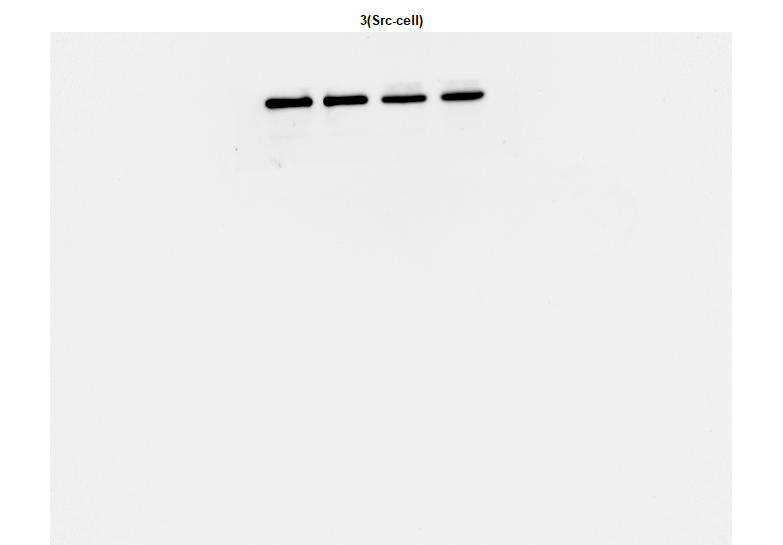


Fig.6B(EGFR)


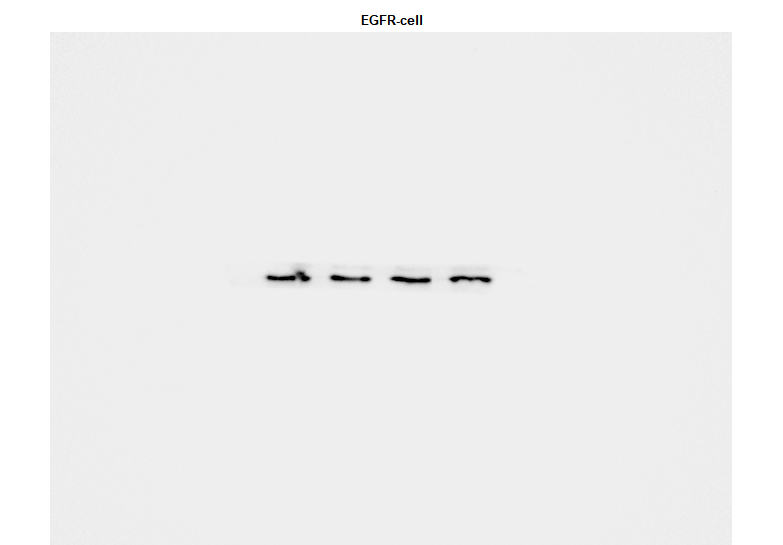


Fig.6B（GAPDH）
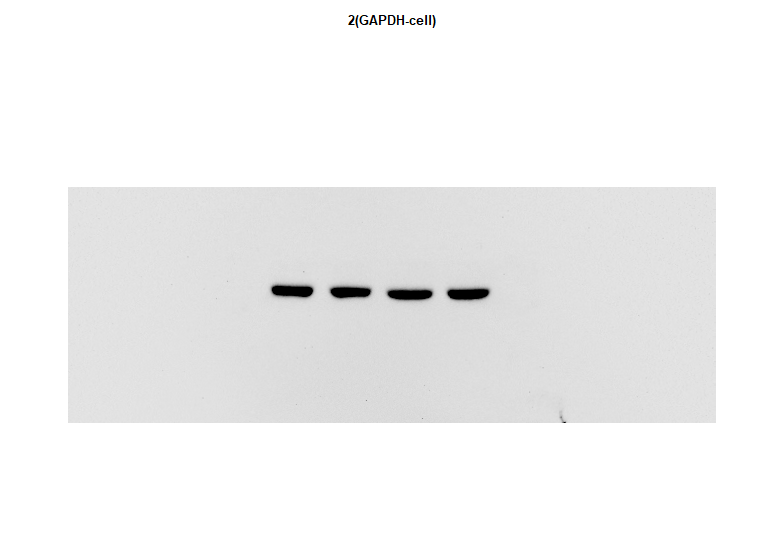


Fig.6B（pEGFR）


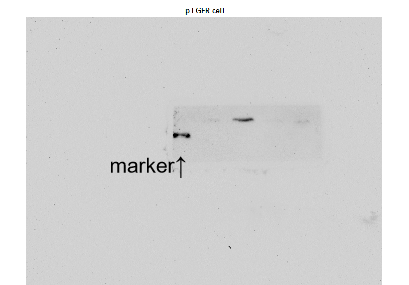


Fig.6C(ERK)


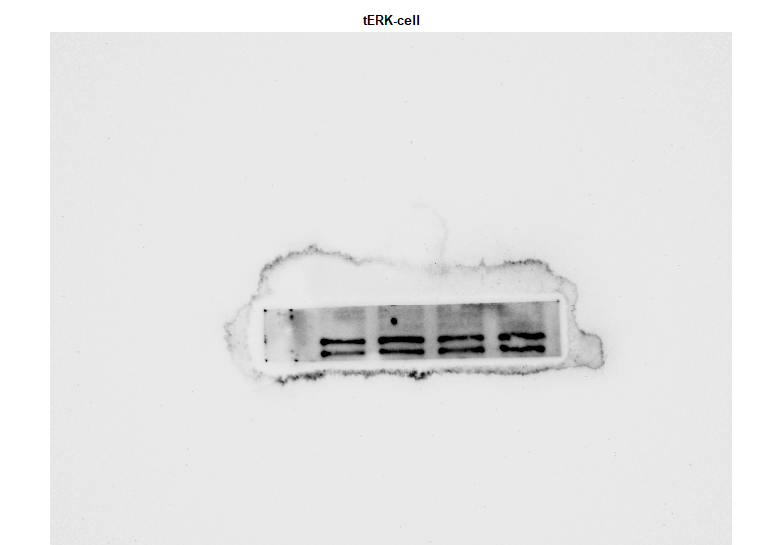


Fig.6C(pERK)


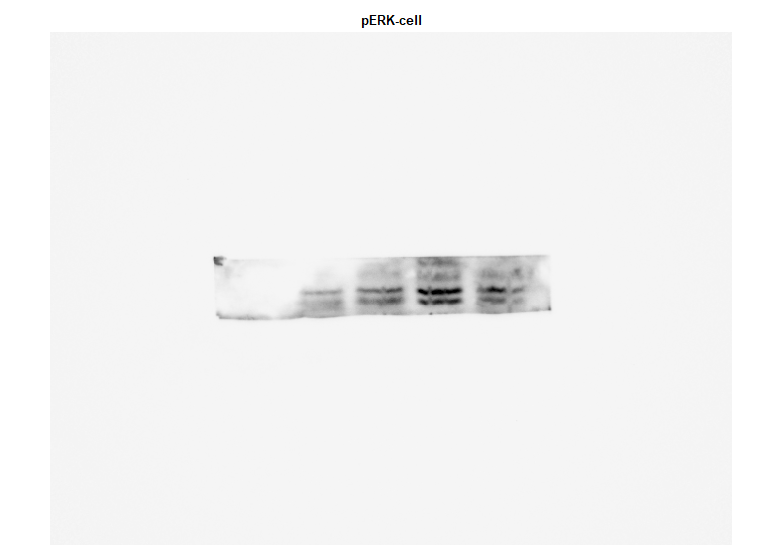


. Fig.6D(GAPDH)


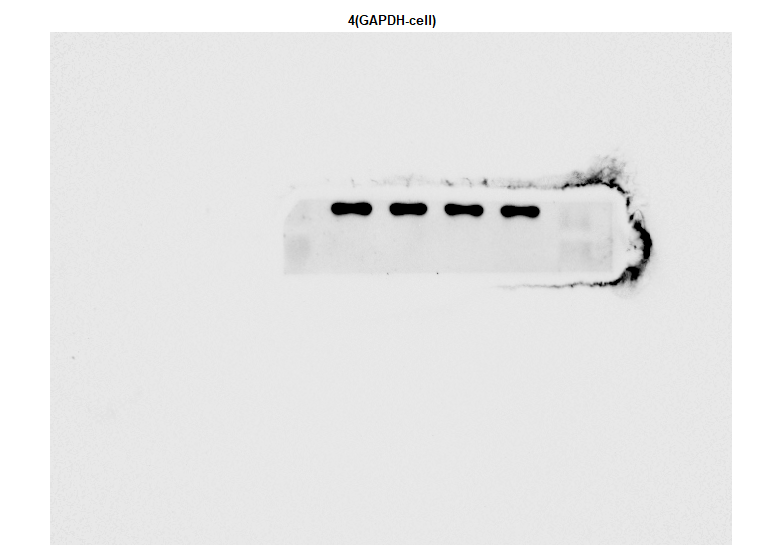


Fig.6D(pSmad3)


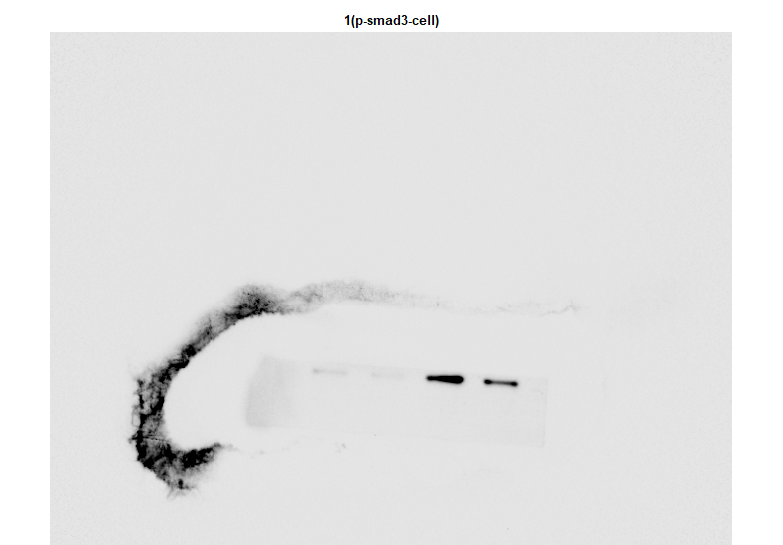


Fig.6D(Smad3)


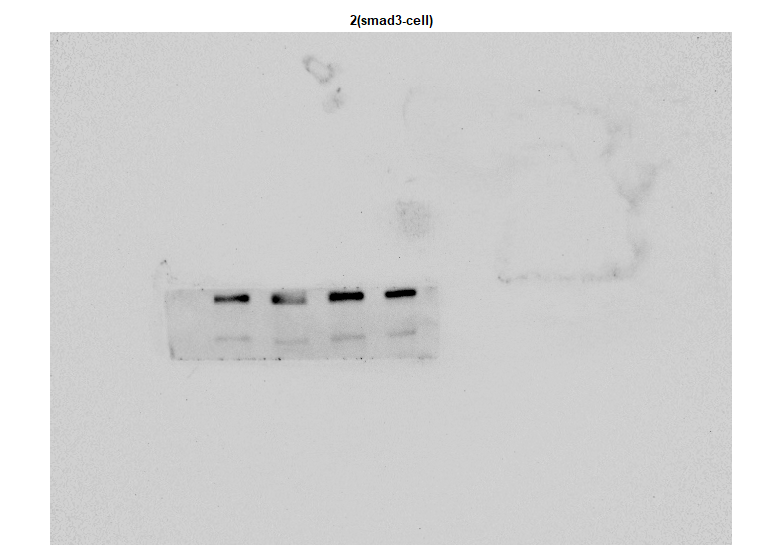

Supplement: Supplementary file 1 [file ac24ff47c187f1f8fb2728db.docx]
